# Supplementary material for: Synthesis, structural analysis, antimicrobial evaluation and synergistic studies of imidazo[1,2-a]pyrimidine chalcogenides
Source: Royal Society of Chemistry journal article supplement (doi:10.1039/c6ra24020h), 2016-01-01
Supplement: c6ra24020h1.pdf [file c6ra24020h1.pdf]

## Synthesis, structural analysis, antimicrobial evaluation and synergistic studies of imidazo[1,2-a]pyrimidine chalcogenides

Nidhi Sharma,<sup>a</sup> Sanjeev Kumar,<sup>a</sup> Indresh K. Maurya,<sup>b</sup> K. K. Bhasin,<sup>\*a</sup> Ajay Verma,<sup>c</sup> Nishima Wangoo,<sup>d</sup> Aman K. K. Bhasin,<sup>a</sup> S. K. Mehta,<sup>\*a</sup> Sangit Kumar,<sup>c</sup> and Rohit K. Sharma<sup>\*a</sup>

<sup>a</sup>Department of Chemistry and Centre for Advanced Studies in Chemistry, Panjab University, Chandigarh, 160014, India

<sup>b</sup>Department of Microbial Biotechnology, Panjab University, Chandigarh, 160014, India

<sup>c</sup>Indian Institute of Science Education and Research (IISER), Bhopal, India

<sup>d</sup>Department of Applied Sciences, University Institute of Engineering and Technology (UIET), Panjab University, Chandigarh, 160014, India

### Table of Contents

| S. No. | Contents                                                                          | Page no. |
|--------|-----------------------------------------------------------------------------------|----------|
| 1      | <sup>1</sup> H NMR, <sup>13</sup> C NMR and mass spectra of compounds <b>4-11</b> | S2-S13   |
| 2      | <sup>77</sup> Se NMR of compound <b>6</b>                                         | S14      |
| 3      | HRMS of compound <b>6</b> and <b>7</b>                                            | S15      |
| 4      | Crystal data and structure refinement for compound <b>6</b>                       | S16      |
| 5      | Selected bond lengths, bond angles and torsional angles for compound <b>6</b>     | S17      |
| 6      | Calculations of theoretical parameters using density functional theory (DFT)      | S18      |
| 7      | Optimized structures of compounds <b>4-11</b>                                     | S19      |
| 8      | HOMO-LUMO diagrams of compounds <b>4-11</b>                                       | S20      |
| 9      | MIC values of compounds <b>4-11</b> against various fungal stains                 | S21      |
| 10     | MIC values of compounds <b>4-11</b> against various bacterial strains             | S22      |

2-((Butylthio)methyl)imidazo[1,2-a]pyrimidine (4) <sup>1</sup>H, <sup>13</sup>C, Mass Spectra

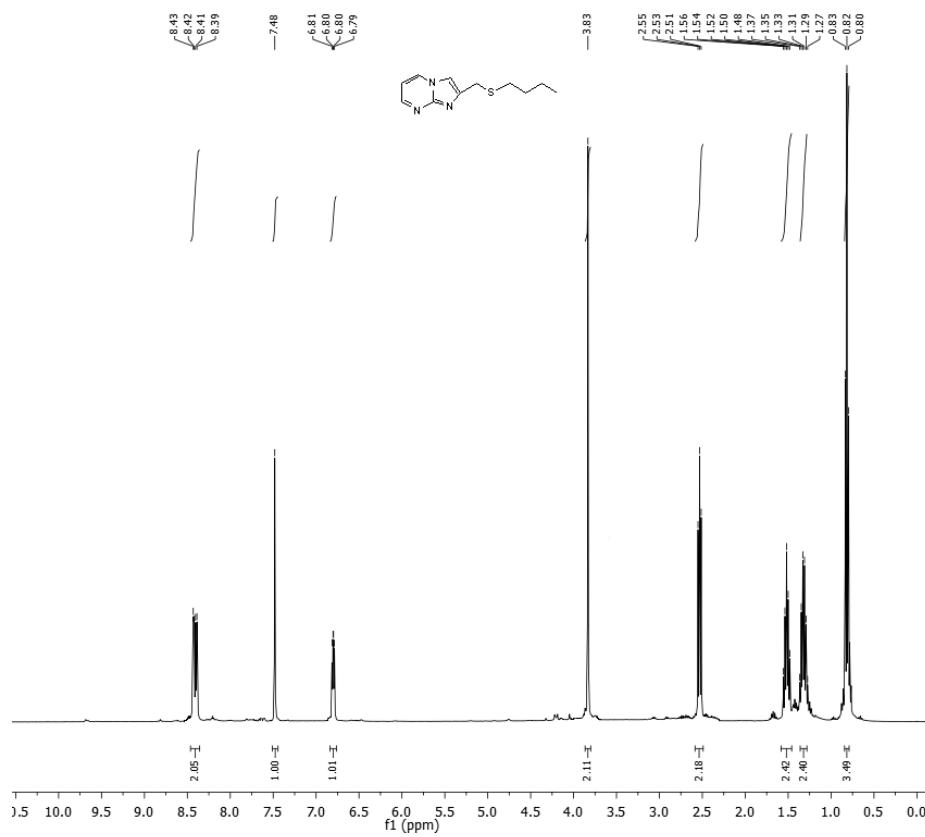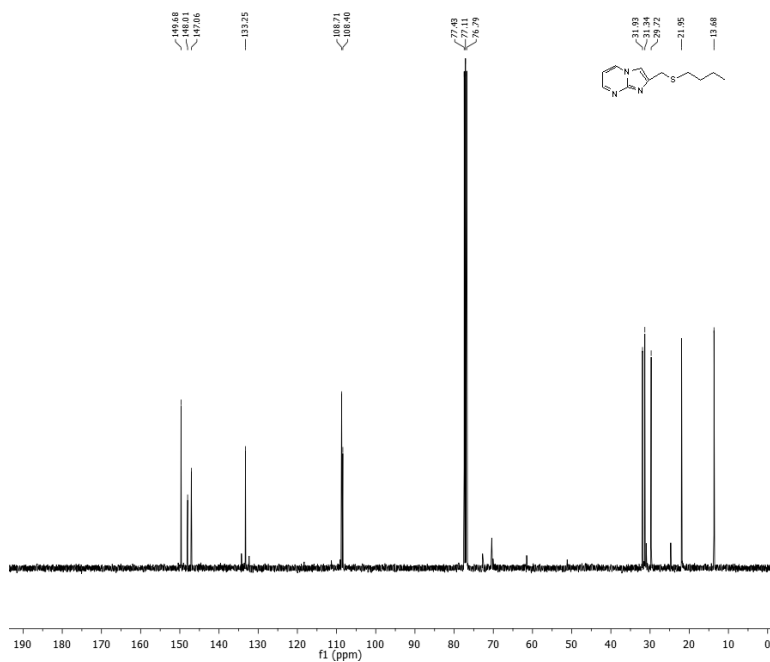

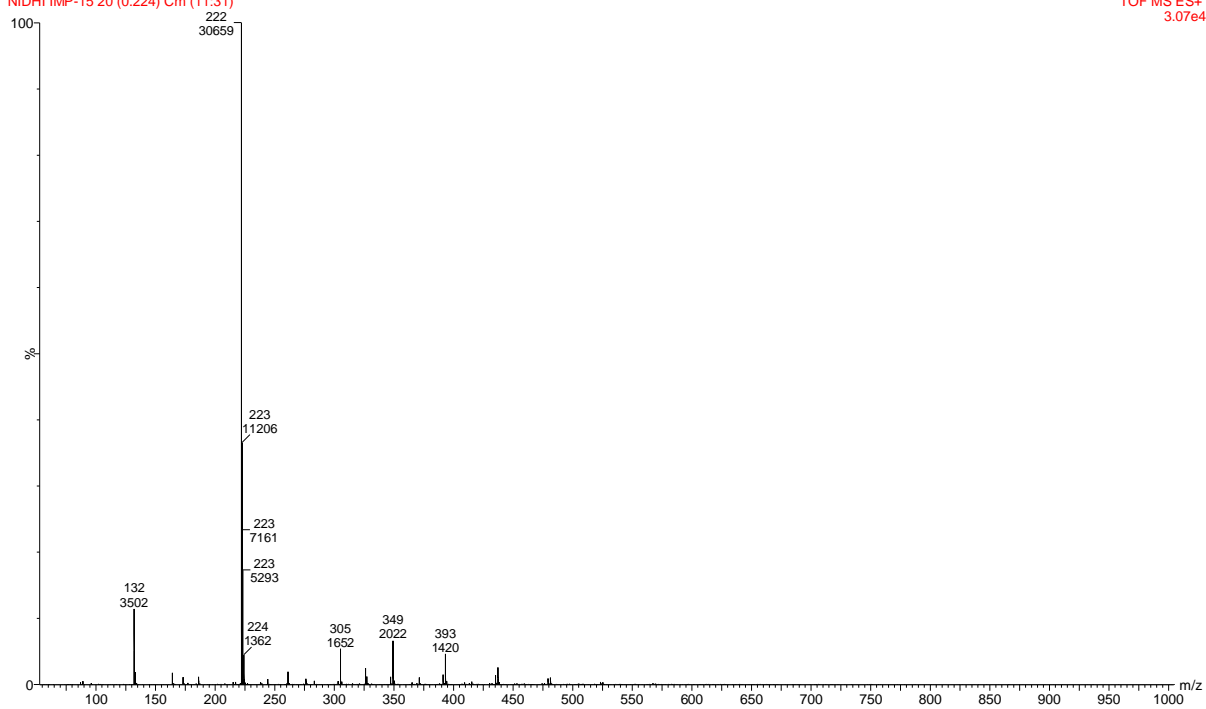

2-((Phenylthio)methyl)imidazo[1,2-a]pyrimidine (5) <sup>1</sup>H, <sup>13</sup>C, Mass Spectra

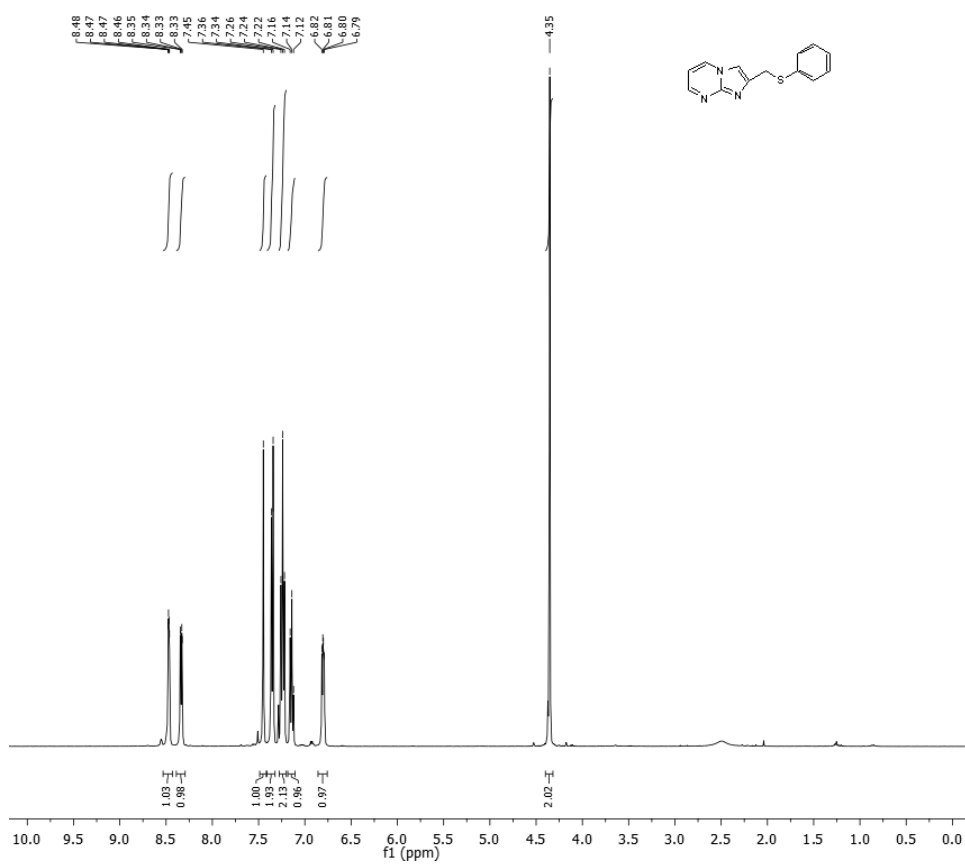

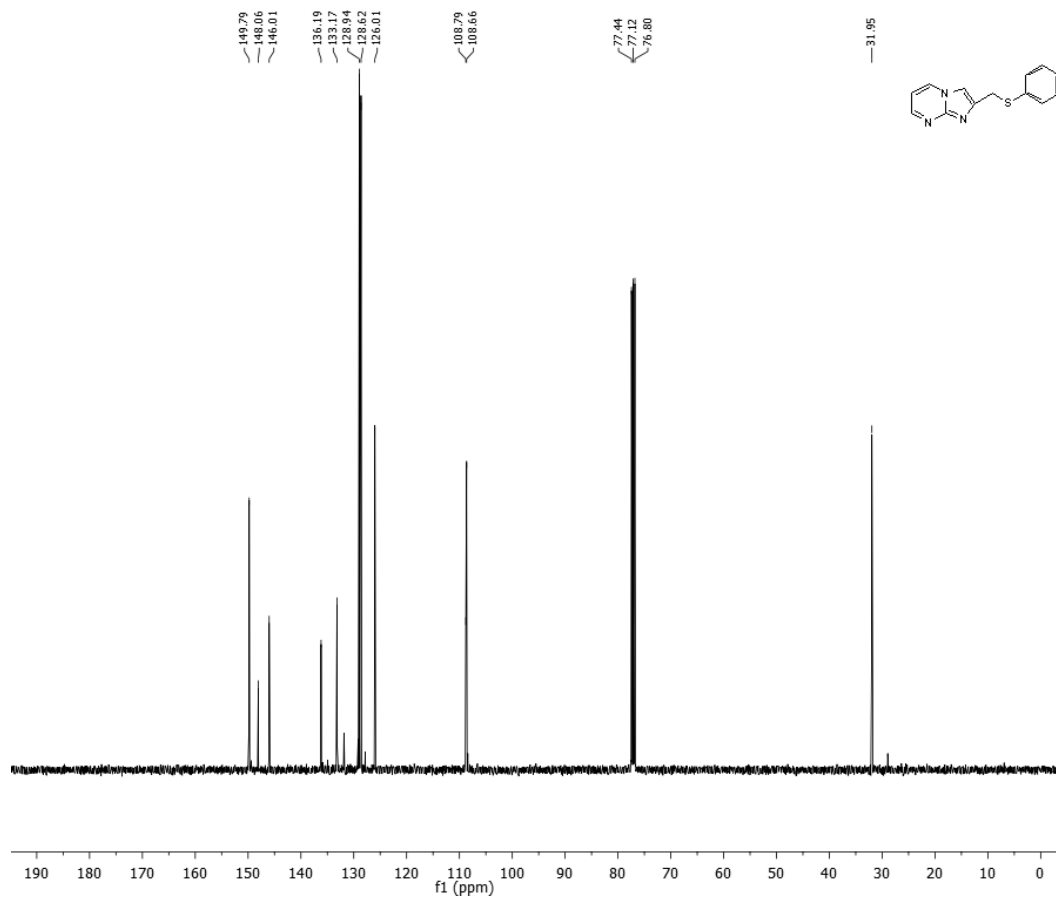

WATERS, Q-TOF MICROMASS (LC-MS)  
 NIDHI IMP-16.8 (0.218) Cm (5:11)

SAIF/CIL, PANJAB UNIVERSITY, CHANDIGARH  
 TOF MS ES+  
 1.87e4

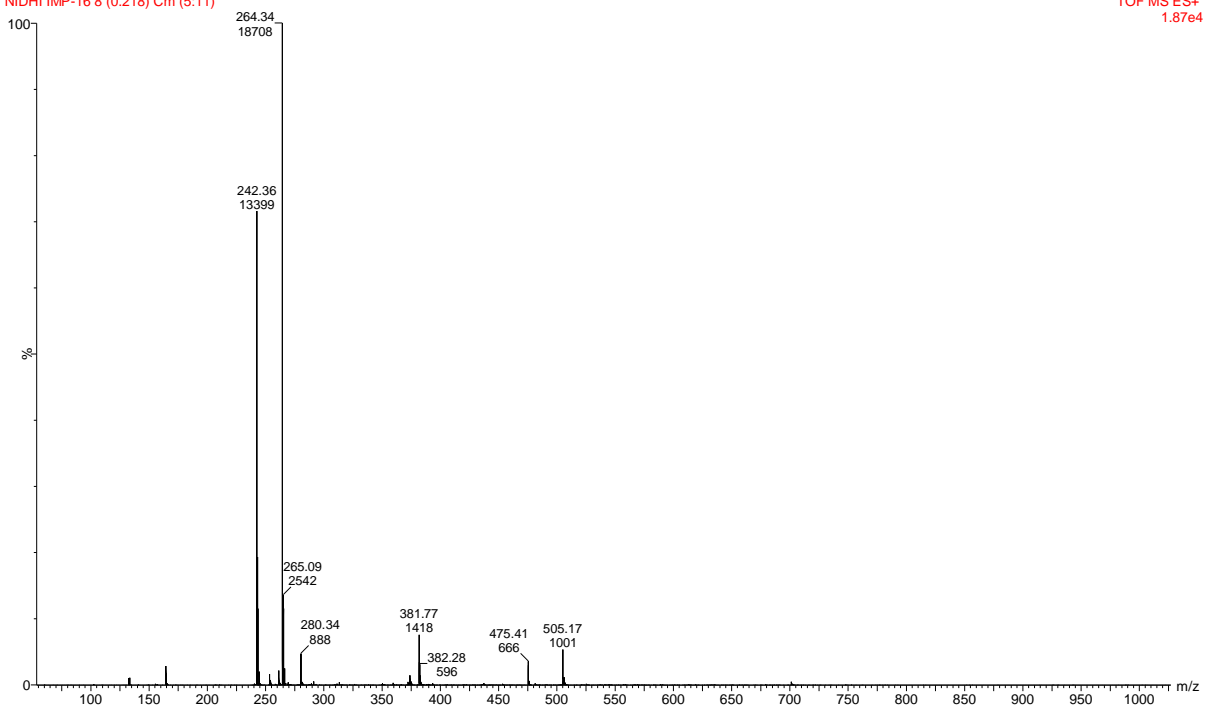

2-((Phenylselanyl)methyl)imidazo[1,2-a]pyrimidine (6) <sup>1</sup>H, <sup>13</sup>C, Mass Spectra

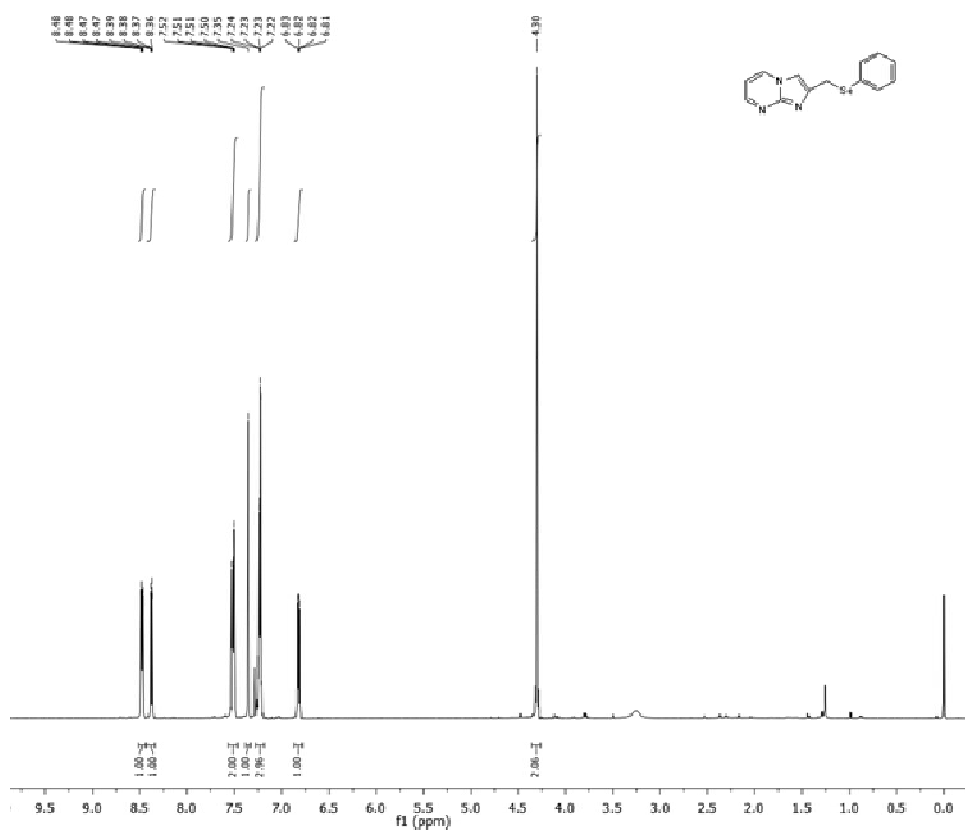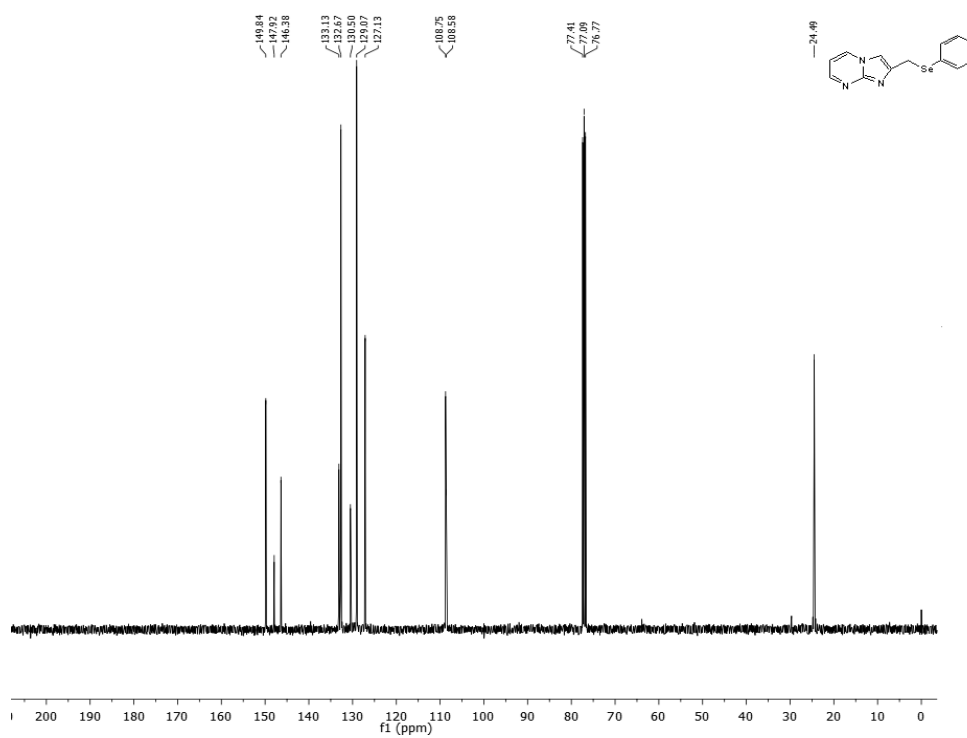

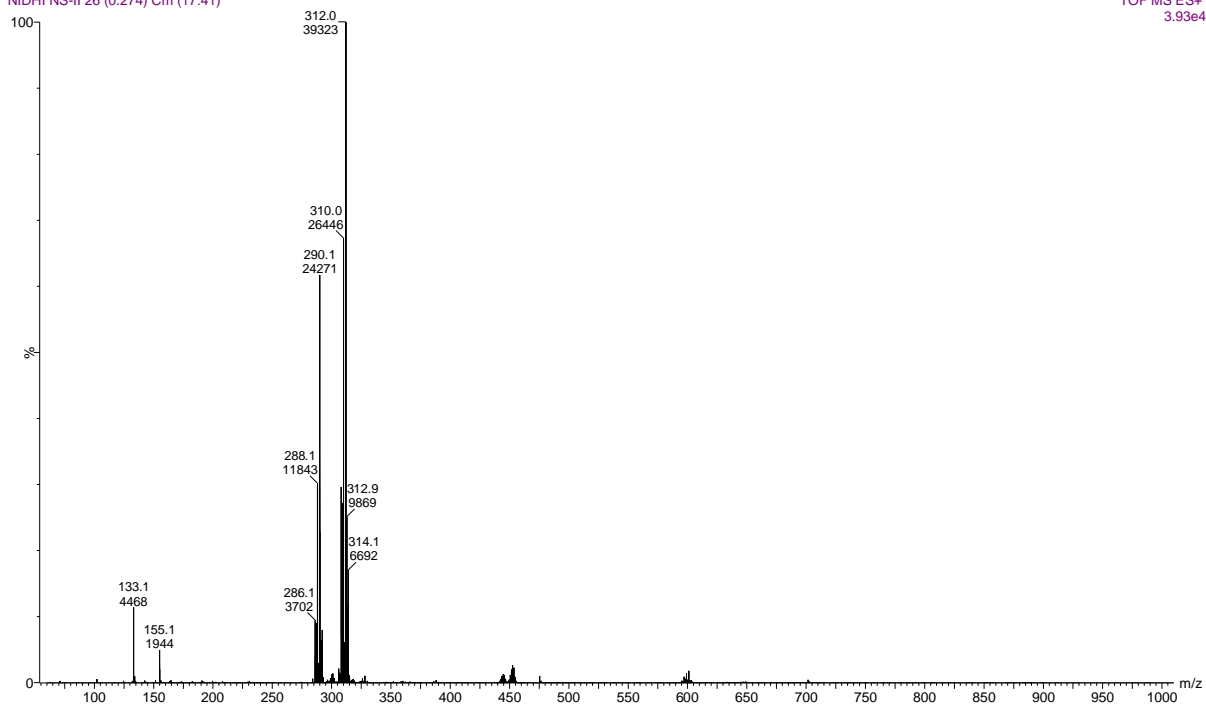

### 2-((Tolylselanyl)methyl)imidazo[1,2-a]pyrimidine (7) <sup>1</sup>H, <sup>13</sup>C, Mass Spectra

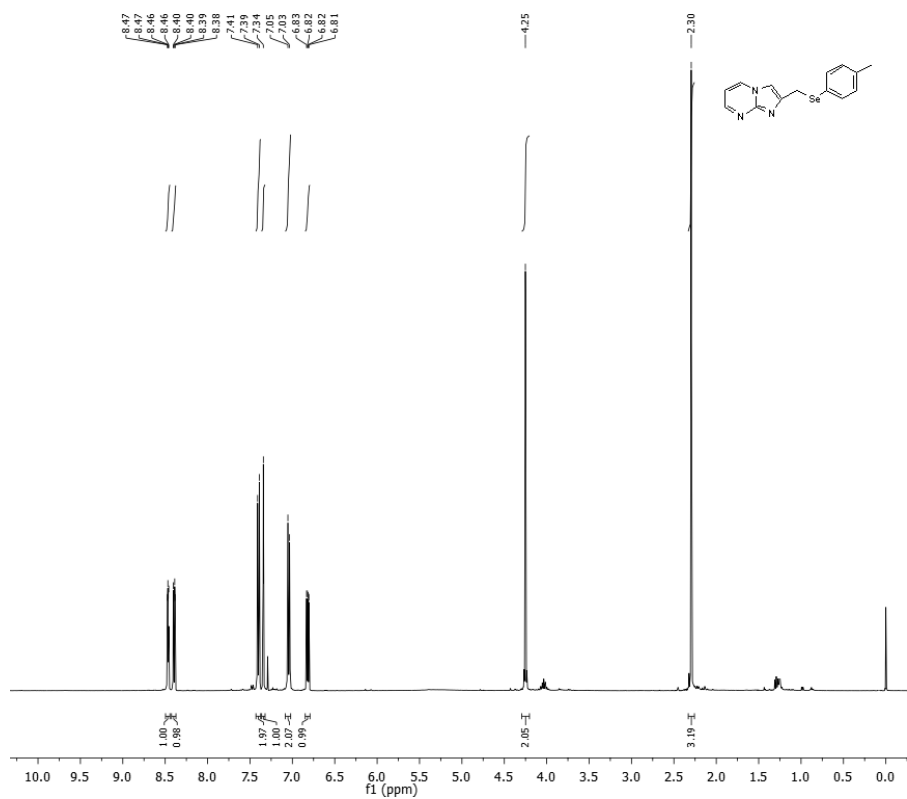

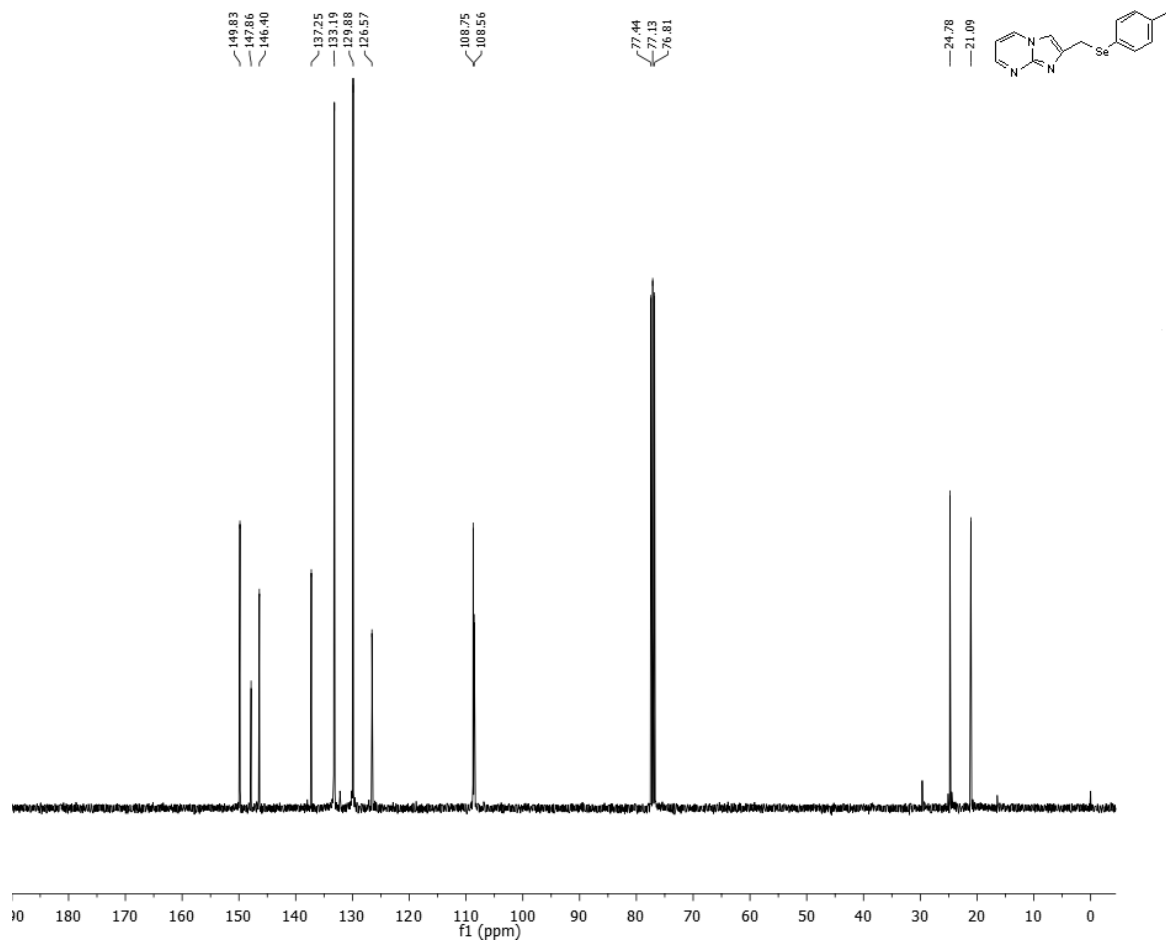

**WATERS, Q-TOF MICROMASS (LC-MS)**

NIDHI IMP-8 7 (0.191) Cm (5:12)

SAIF/CIL, PANJAB UNIVERSITY, CHANDIGARH

TOF MS ES+  
2.27e4

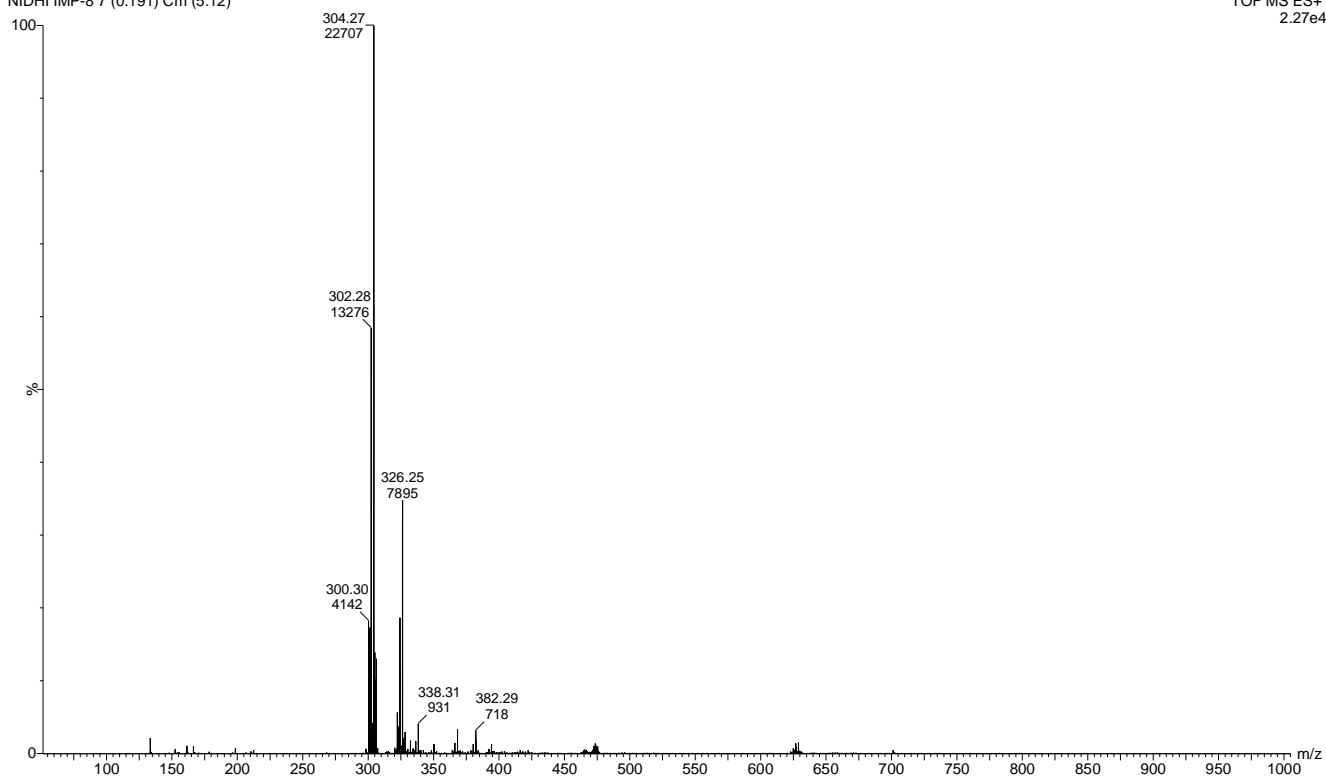

2-((Mesitylselenyl)methyl)imidazo[1,2-a]pyrimidine (8)  $^1\text{H}$ ,  $^{13}\text{C}$ , Mass Spectra

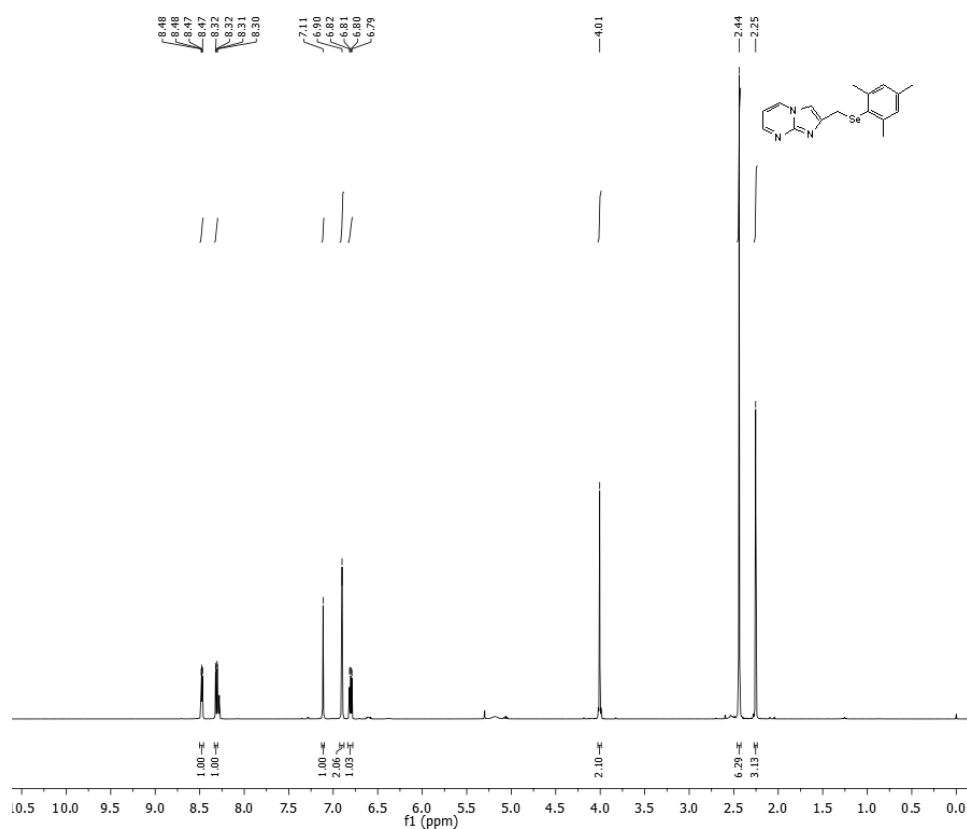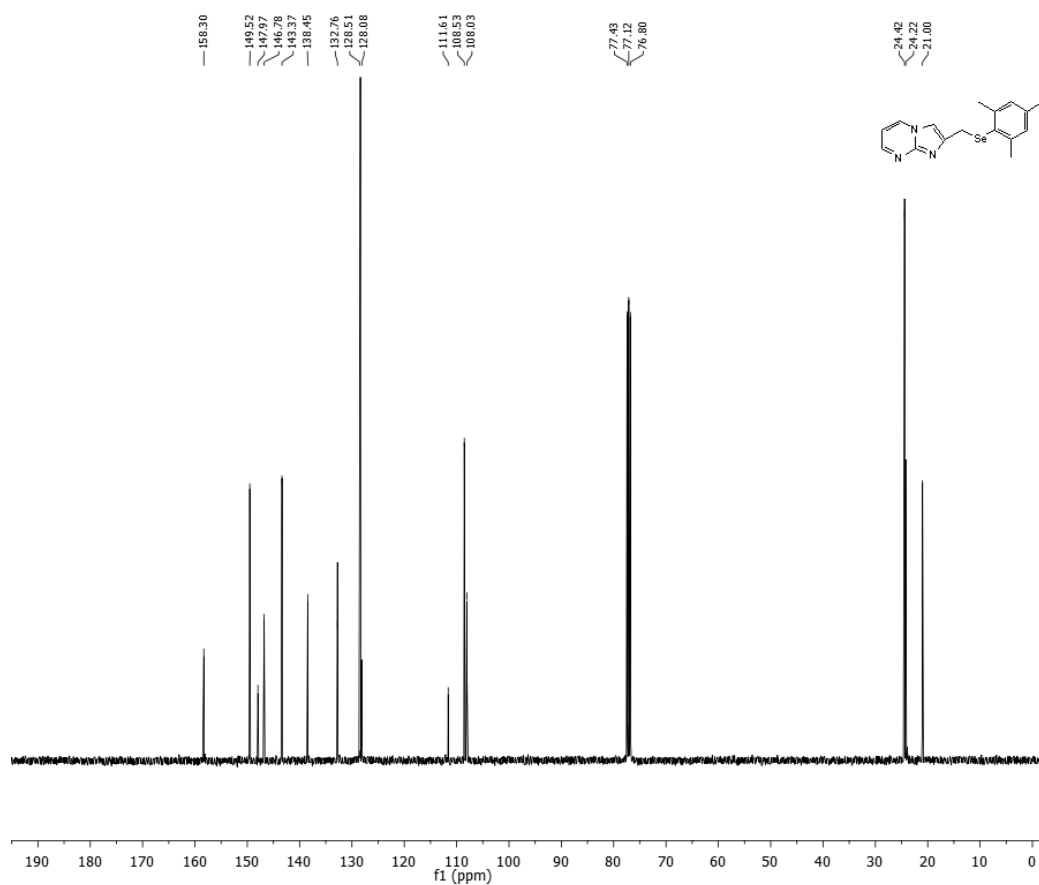



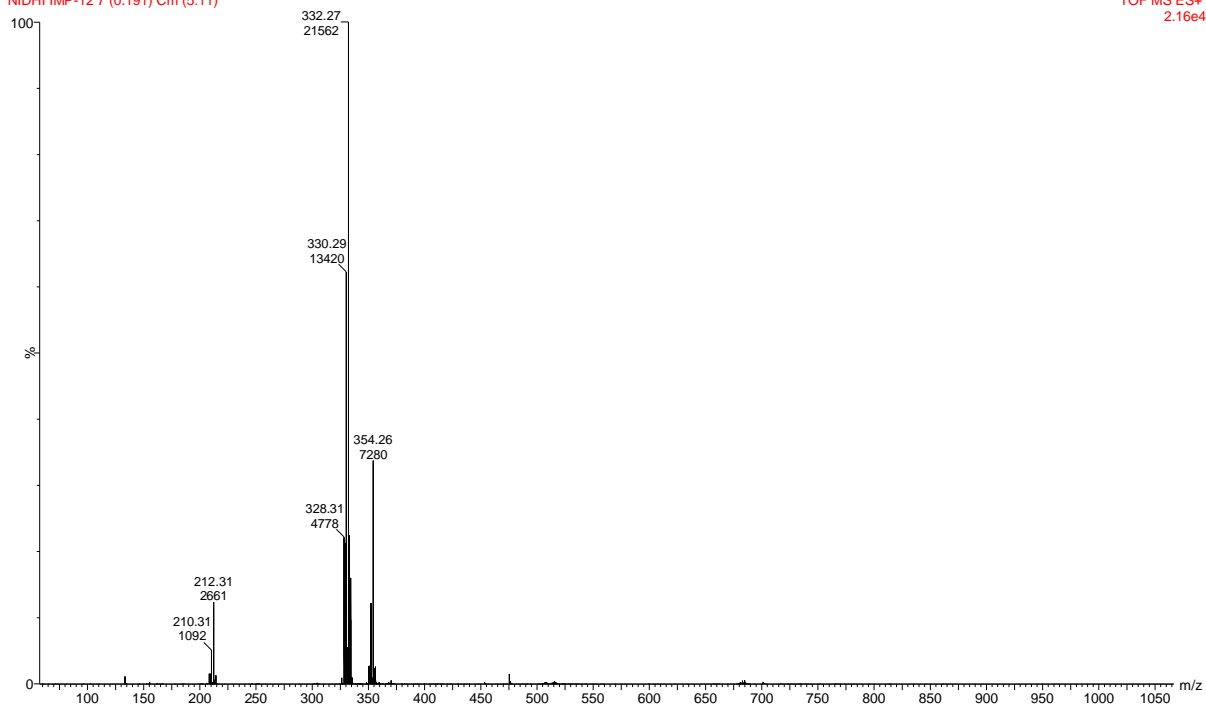

2-((Pyridylselanyl)methyl)imidazo[1,2-a]pyrimidine (9)  $^1\text{H}$ ,  $^{13}\text{C}$ , Mass Spectra

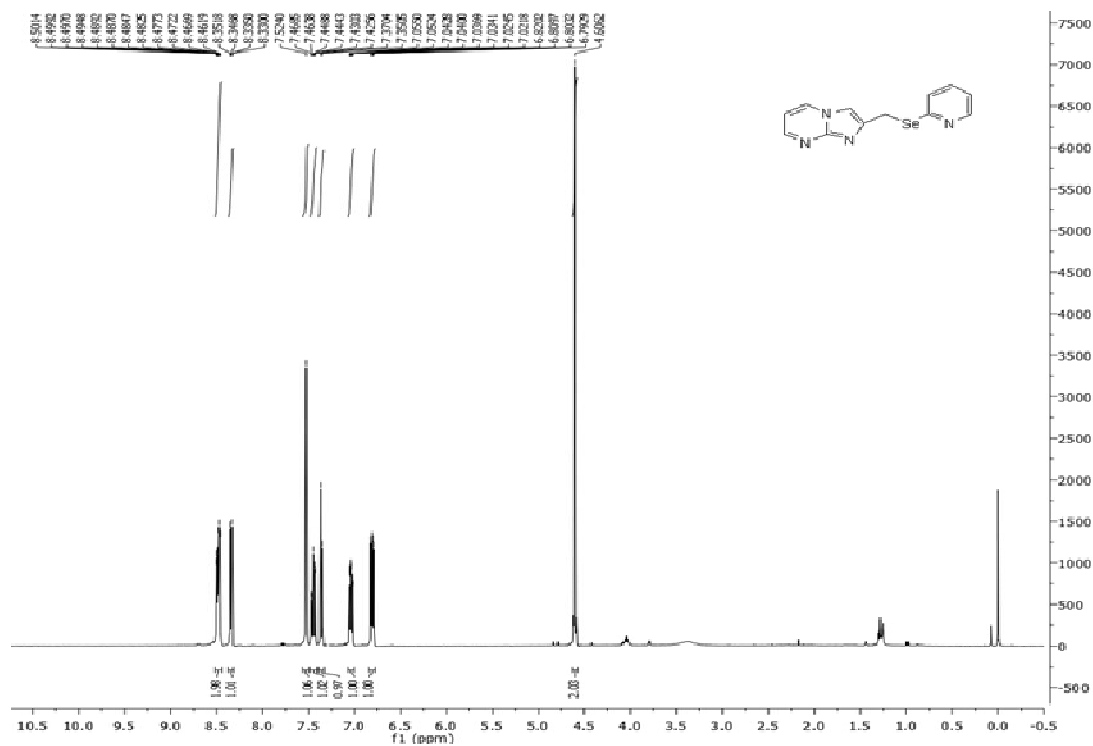

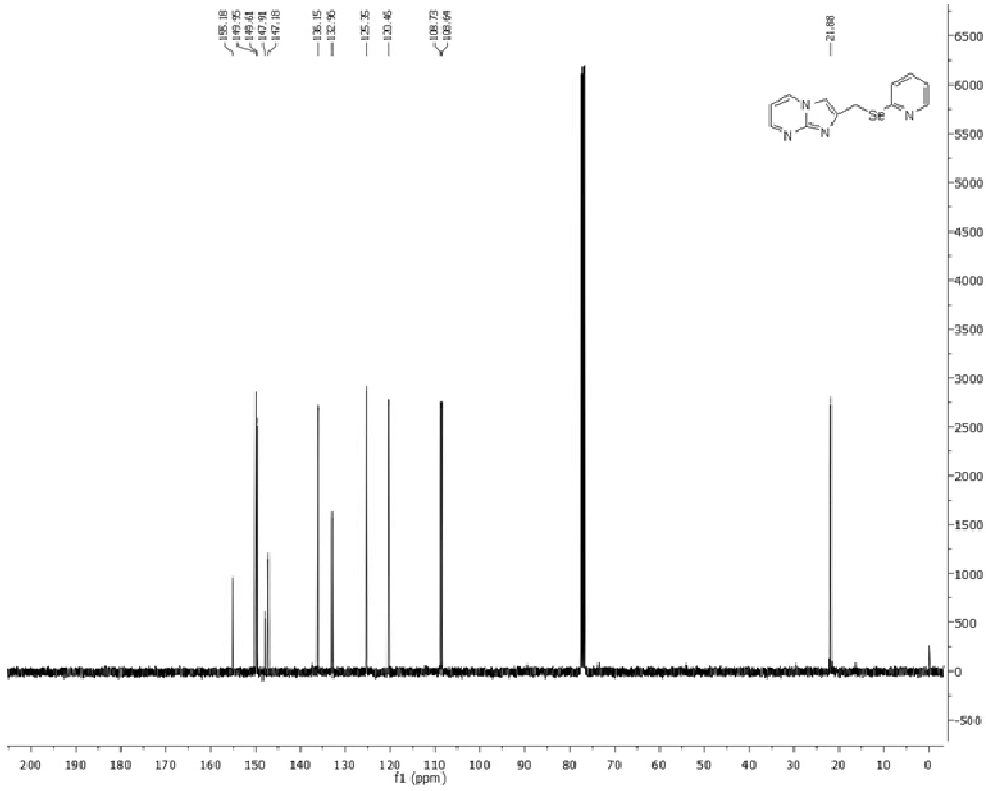

**WATERS, Q-TOF MICROMASS (LC-MS)**

NIDHI IMP-14 6 (0.164) Cm (4:13)

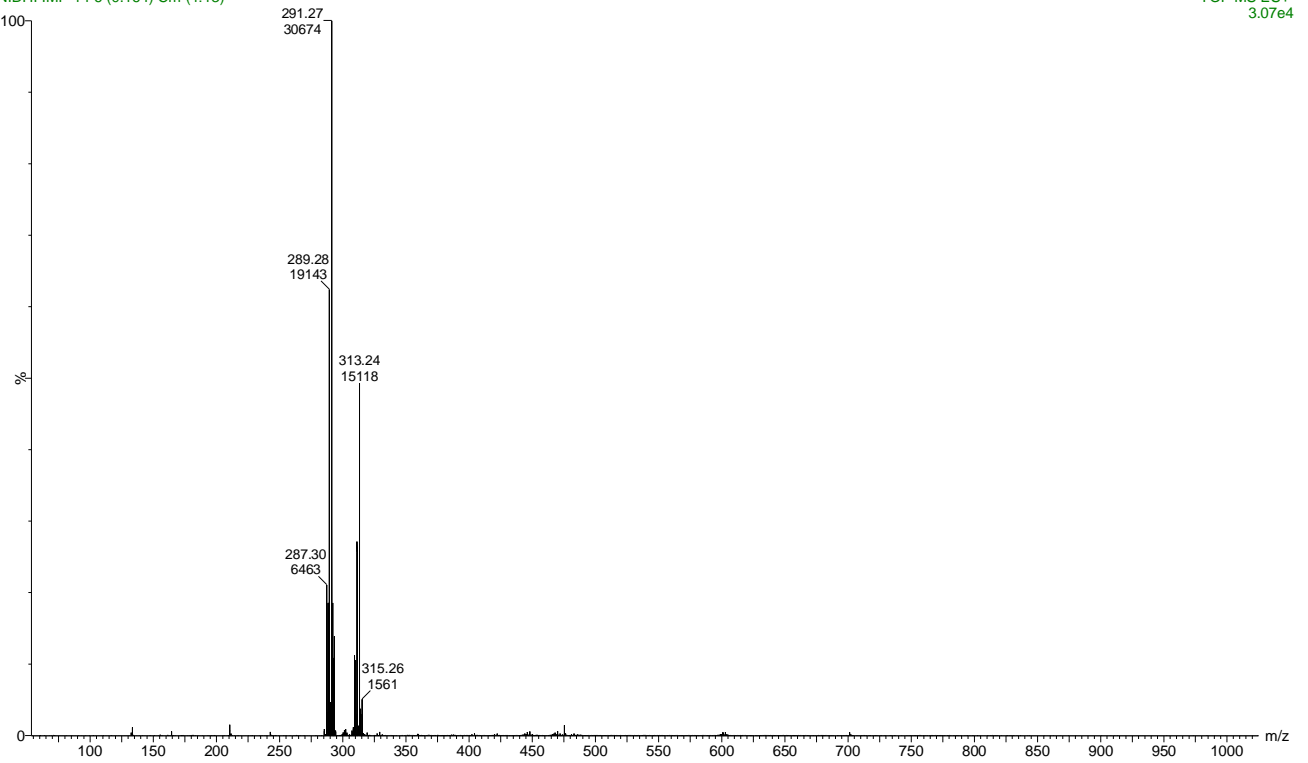

**SAIF/CIL, PANJAB UNIVERSITY, CHANDIGARH**

TOF MS ES+  
3.07e4

Bis(imidazo[1,2-a]pyrimidin-2-ylmethyl)disulfide (10) <sup>1</sup>H, <sup>13</sup>C, Mass Spectra

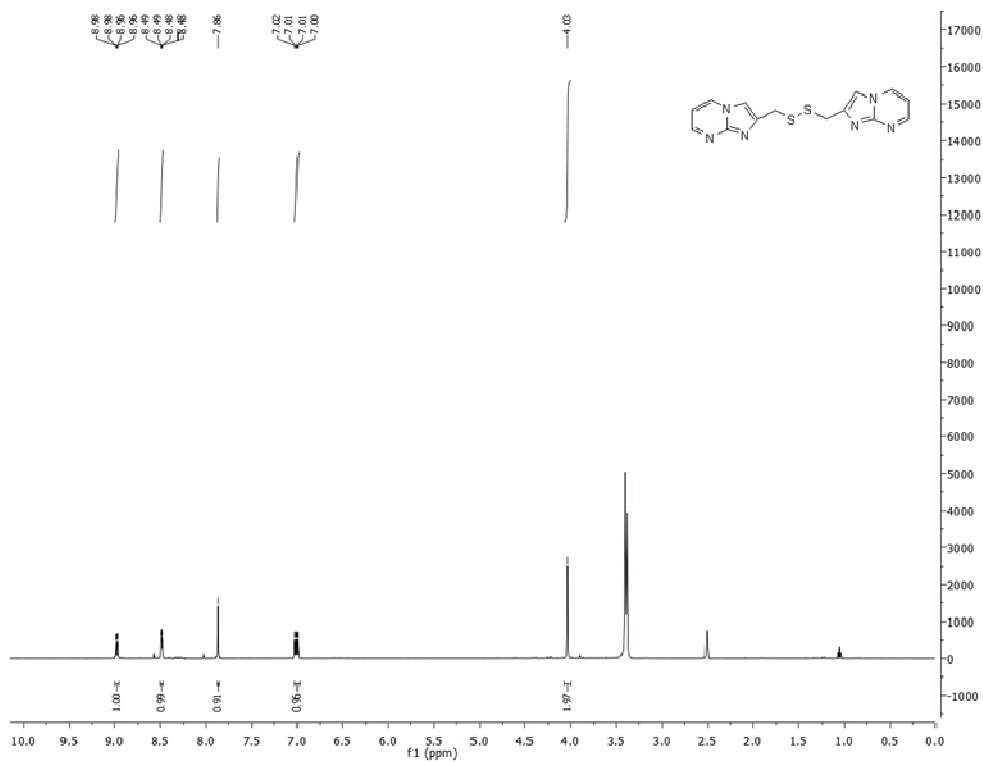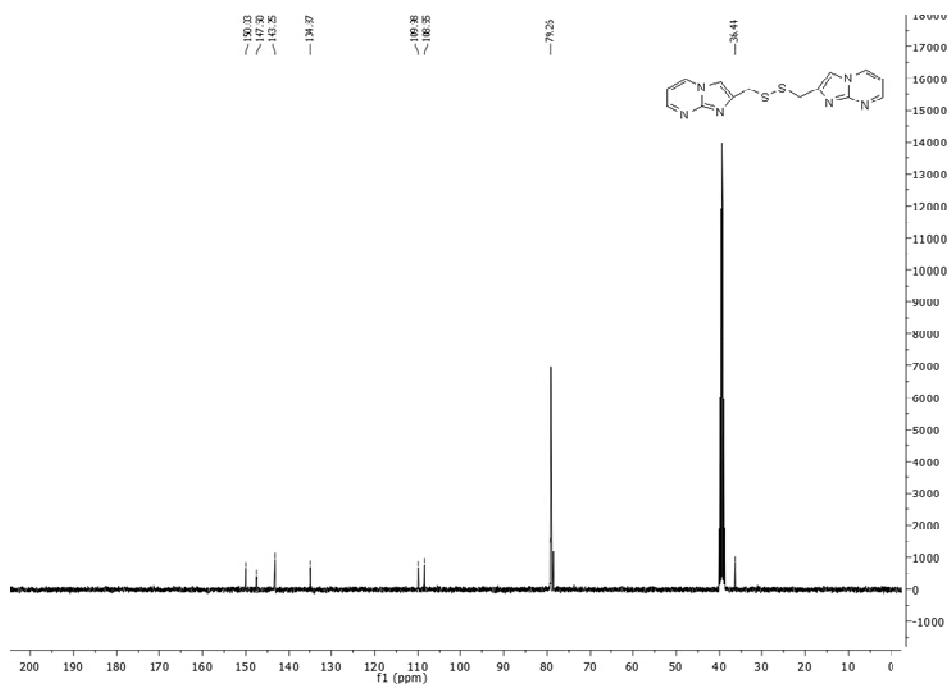

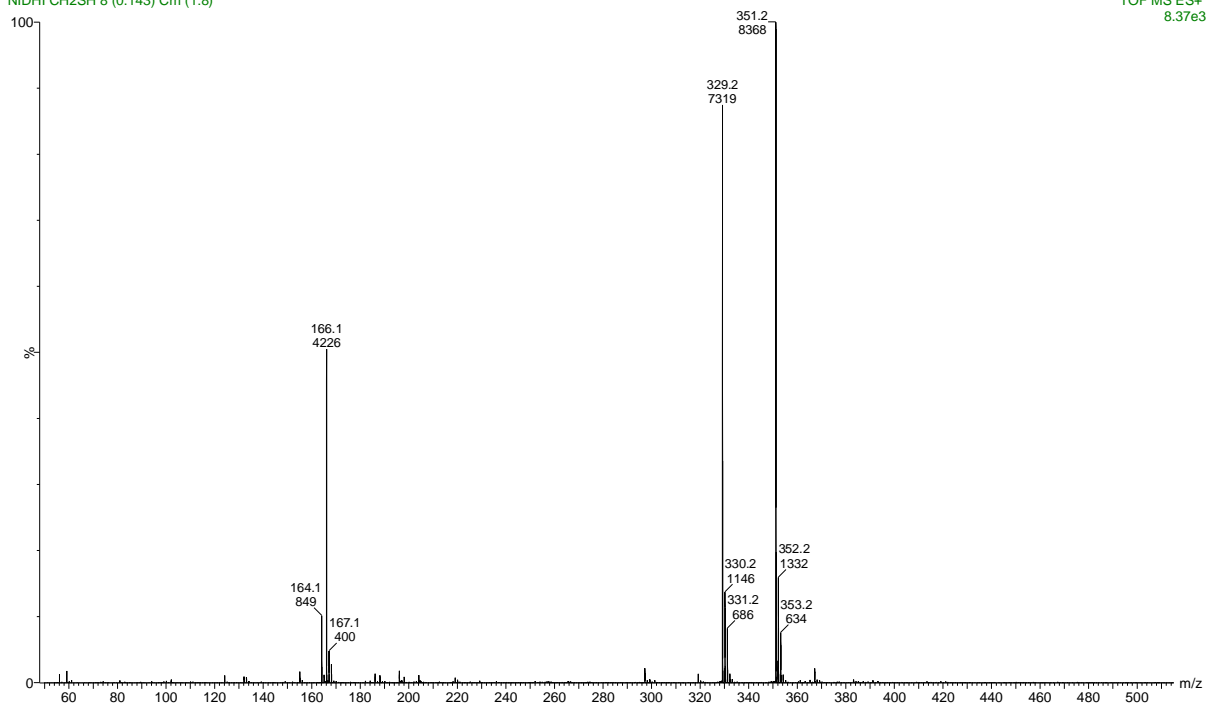

Bis(imidazo[1,2-a]pyrimidin-2-ylmethyl)selane (11) <sup>1</sup>H, <sup>13</sup>C, Mass Spectra

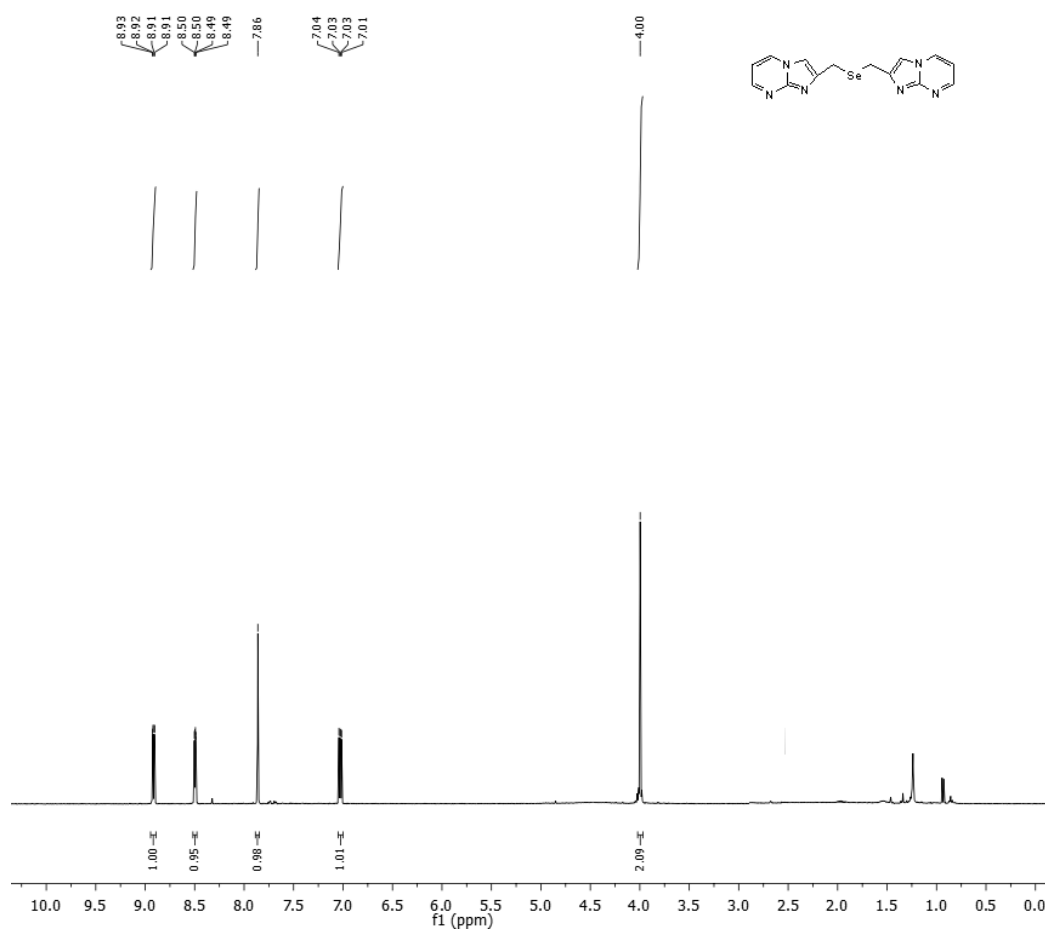

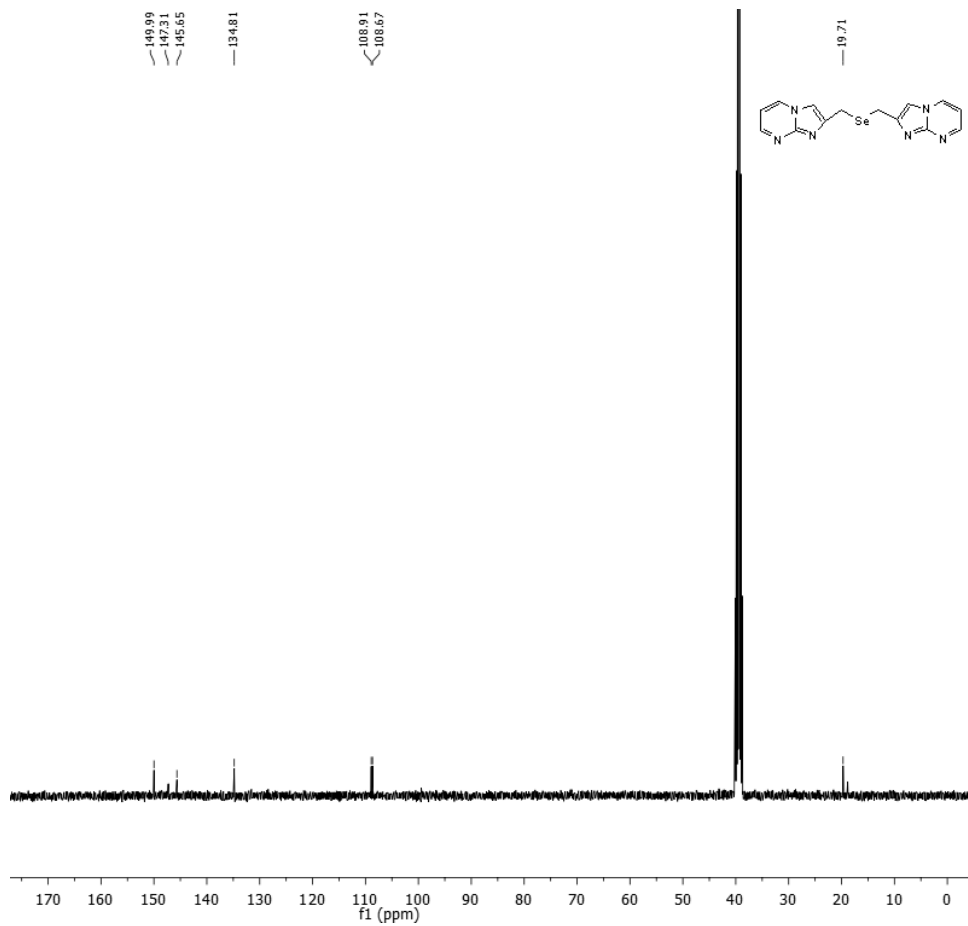

WATERS, Q-TOF MICROMASS (LC-MS)  
 NIDHI IMPSe 16 (0.169) Cm (8:35)

SAIF/CIL,PANJAB UNIVERSITY,CHANDIGARH  
 TOF MS ES+  
 2.44e4

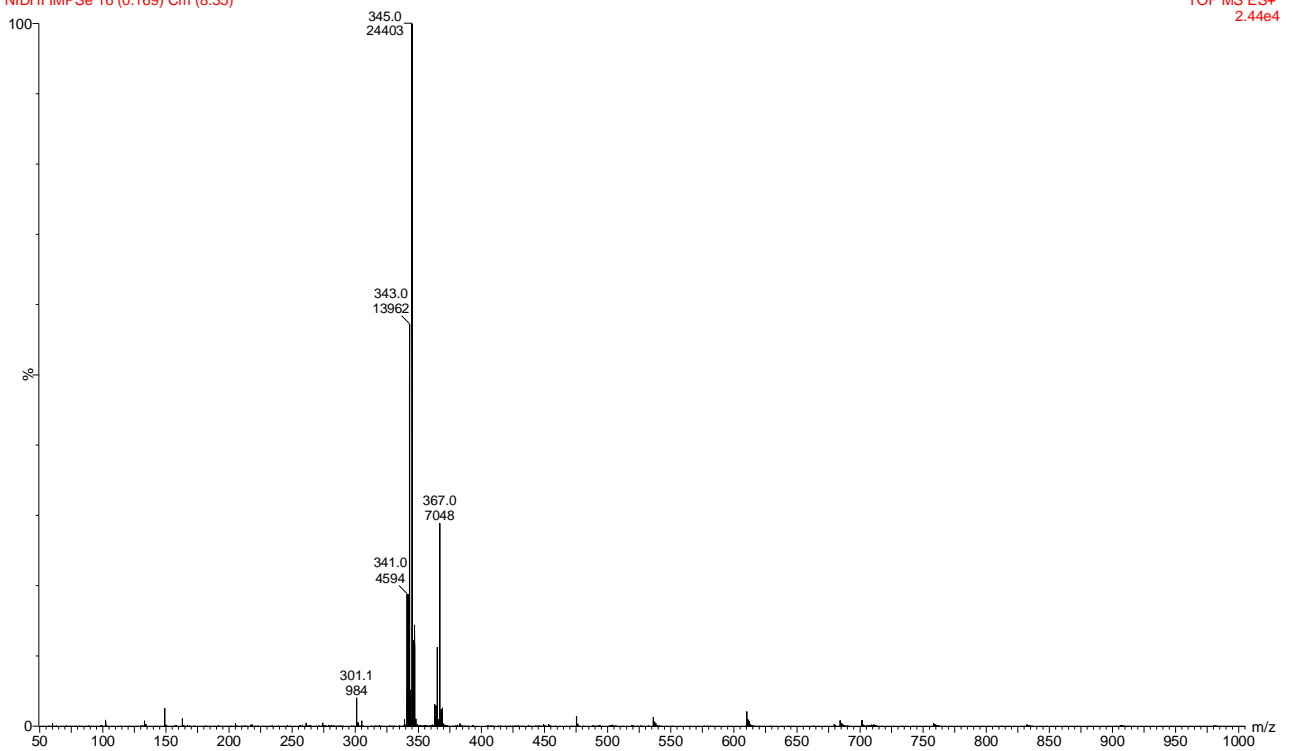

2-((Phenylselenanyl)methyl)imidazo[1,2-a]pyrimidine (6)  $^{77}\text{Se}$  NMR

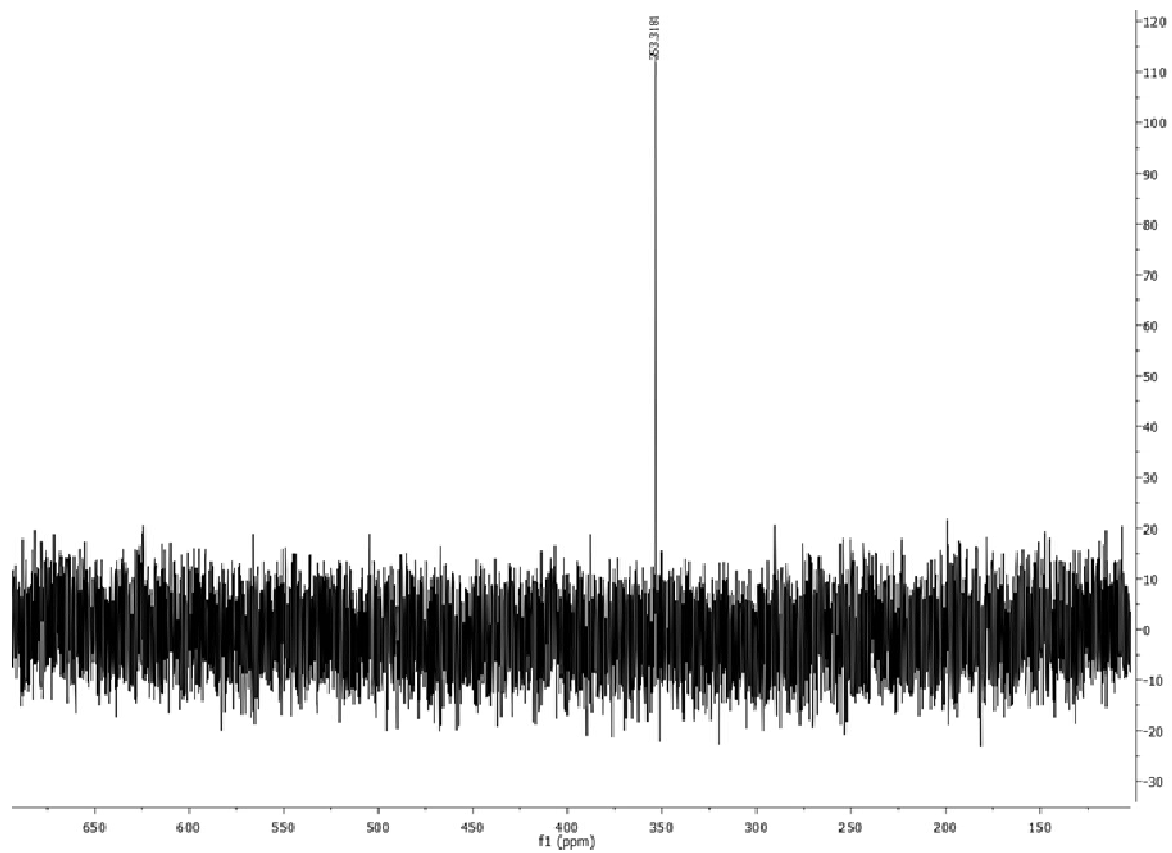

## 2-((Phenylselanyl)methyl)imidazo[1,2-a]pyrimidine (6) HRMS

WATERS, Q-TOF MICROMASS (ESI-MS)

NIDHI IMP-7 6 (0.177) AM (Top,10, Ar,5000.0,556.28,0.70,LS 10); Sm (Mn, 2x3.00); Sb (1,40.00); Cm (6:8-16:20)

SAIF/CIL,PANJAB UNIVERSITY,CHANDIGARH

1: TOF MS ES+  
3.85e4

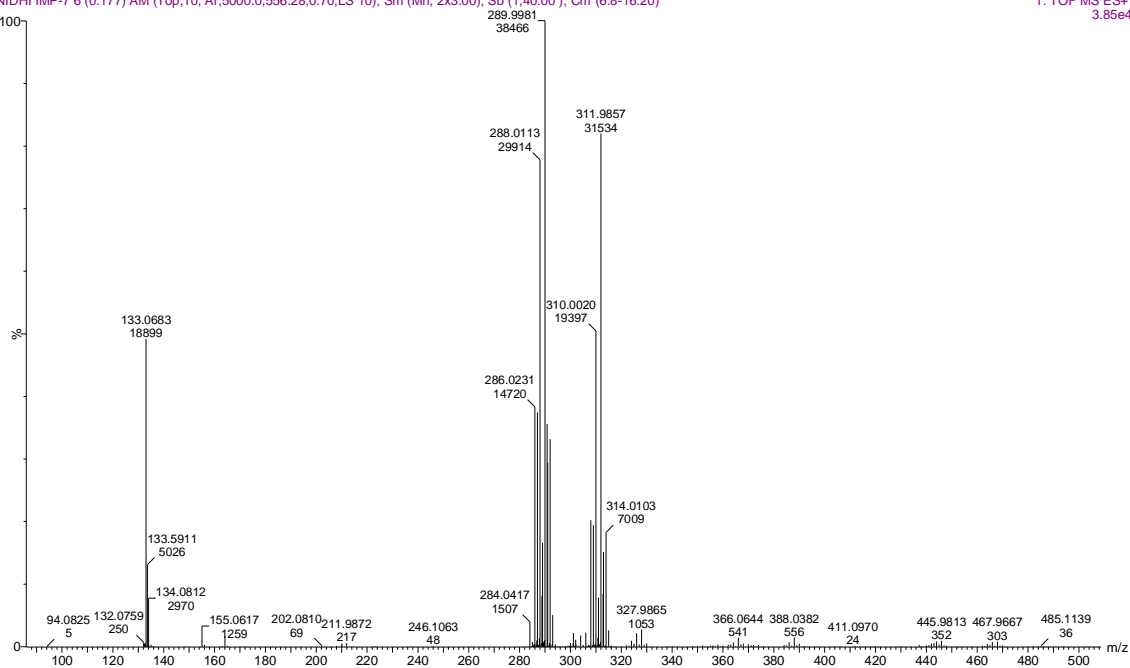

## 2-((Tolylselanyl)methyl)imidazo[1,2-a]pyrimidine (7)

WATERS, Q-TOF MICROMASS (ESI-MS)

NIDHI IMP-8 5 (0.153) AM (Top,10, Ar,5000.0,556.28,0.70,LS 10); Sm (Mn, 2x3.00); Sb (1,40.00); Cm (5:8-21:28)

SAIF/CIL,PANJAB UNIVERSITY,CHANDIGARH

1: TOF MS ES+  
7.00e4

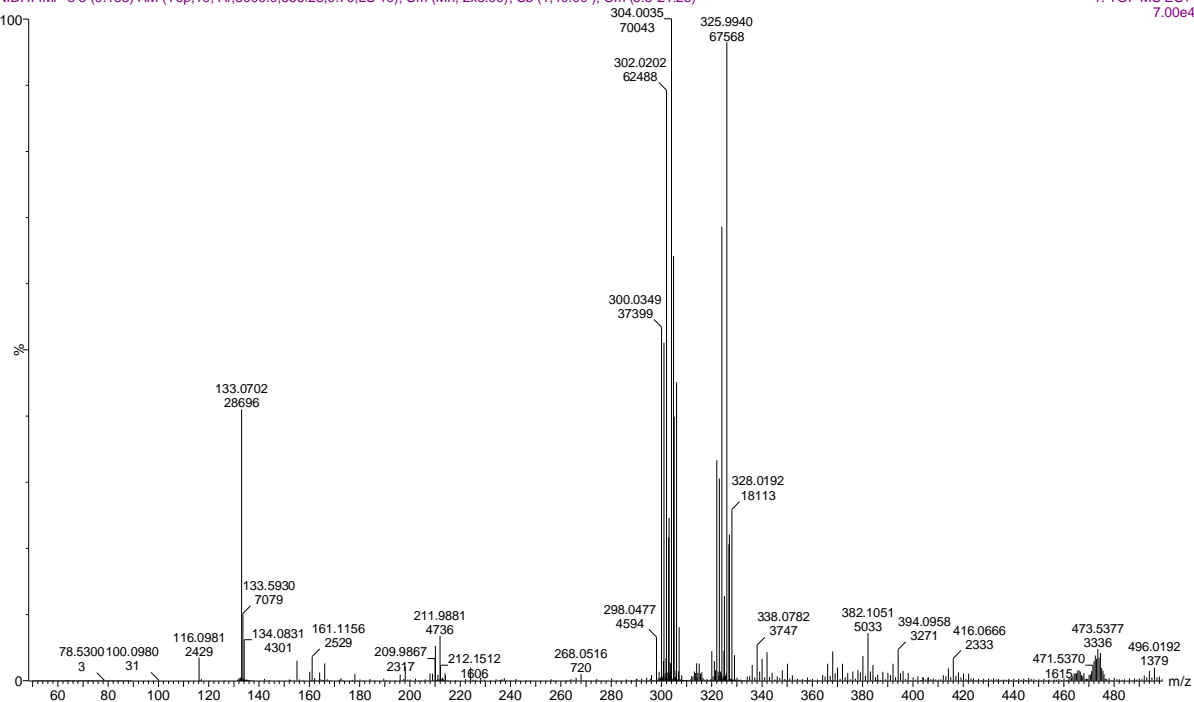

**Table S1** Crystal data and structure refinement for **6**

|                                 |                                                                                                       |
|---------------------------------|-------------------------------------------------------------------------------------------------------|
| Empirical formula               | C13 H11 N3 Se                                                                                         |
| Formula weight                  | 288.21                                                                                                |
| Temperature                     | 296(2) K                                                                                              |
| Wavelength                      | 0.71073 Å                                                                                             |
| Crystal system                  | Trigonal                                                                                              |
| Space group                     | R -3                                                                                                  |
| Unit cell dimensions            | a = 31.935(2) Å, $\alpha$ = 90°<br>b = 31.935(2) Å, $\beta$ = 90°<br>c = 6.3894(5) Å, $\gamma$ = 120° |
| Volume                          | 5643.3(9) Å <sup>3</sup>                                                                              |
| Z                               | 18                                                                                                    |
| Density (calculated)            | 1.526 g/cm <sup>3</sup>                                                                               |
| Absorption coefficient          | 2.974 mm <sup>-1</sup>                                                                                |
| F(000)                          | 2592                                                                                                  |
| Theta range for data collection | 2.209 to 26.053°                                                                                      |
| Index ranges                    | -39<=h<=39, -39<=k<=39, -7<=l<=7                                                                      |
| Reflections collected           | 27802                                                                                                 |
| Independent reflections         | 2467 [R(int) = 0.0928]                                                                                |
| Completeness to theta = 25.242° | 99.5 %                                                                                                |
| Absorption correction           | None                                                                                                  |
| Refinement method               | Full-matrix least-squares on F2                                                                       |
| Data / restraints / parameters  | 2467 / 0 / 154                                                                                        |
| Goodness-of-fit on F2           | 1.102                                                                                                 |
| Final R indices [I>2sigma(I)]   | R1 = 0.0442, wR2 = 0.1088                                                                             |
| R indices (all data)            | R1 = 0.0760, wR2 = 0.1186                                                                             |
| Extinction coefficient          | n/a                                                                                                   |
| Largest diff. peak and hole     | 0.592 and -0.281 e Å <sup>-3</sup>                                                                    |



**Table S2** Selected bond lengths (Å), bond angles (°) and torsional angles (°) for compound **6**

|         |       |                |          |
|---------|-------|----------------|----------|
| Se1-C8  | 1.917 | C8-C9          | 1.378    |
| Se1-C1  | 1.966 | C8-C13         | 1.383    |
| N3-C3   | 1.371 | C6-C5          | 1.402    |
| N3-C4   | 1.372 | C2-C1-Se1      | 113.100  |
| N3-C7   | 1.391 | C8-Se1-C1      | 101.280  |
| N1-C7   | 1.316 | C2-C3-H3       | 127.100  |
| N1-C2   | 1.376 | N3-C3-H3       | 127.100  |
| N2-C6   | 1.318 | C1-Se1-C8-C13  | 37.700   |
| N2-C7   | 1.346 | C1-Se1-C8-C9   | -144.600 |
| C2-C3   | 1.356 | Se1-C8-C9-C10  | -178.500 |
| C5-C4   | 1.338 | C8-Se1-C1-C2   | 68.500   |
| C13-C12 | 1.368 | N1-C2-C1-Se1   | 74.300   |
| C9-C10  | 1.363 | C3-C2-C1-Se1   | -104.600 |
| C12-C11 | 1.376 | Se1-C8-C13-C12 | 178.700  |
| C11-C10 | 1.384 | C3-N3-C7-N1    | -0.200   |
| C2-C1   | 1.477 | C3-N3-C7-N2    | -179.100 |

| Compound  | Energy<br>(a.u.) | Band gap<br>(eV) | Se1/S1-C8 Bond<br>length (Å) | Se1-C1 Bond<br>length (Å) | C8-Se1-C1<br>Bond angle (°) | C8-Se1-C1-C2<br>Dihedral angle (°) |
|-----------|------------------|------------------|------------------------------|---------------------------|-----------------------------|------------------------------------|
| <b>4</b>  | -990.6457        | 4.1676           | 1.840                        | 1.850                     | 100.53                      | -73.31                             |
| <b>5</b>  | -1064.4399       | 3.9608           | 1.793                        | 1.858                     | 103.76                      | -99.03                             |
| <b>6</b>  | -3065.6345       | 3.9197           | 1.920                        | 2.000                     | 99.70                       | -101.40                            |
| <b>7</b>  | -3104.9527       | 3.8906           | 1.925                        | 2.000                     | 99.74                       | -101.13                            |
| <b>8</b>  | -3183.5905       | 3.9017           | 1.930                        | 2.000                     | 99.63                       | -109.90                            |
| <b>9</b>  | -3081.6726       | 4.2019           | 1.920                        | 1.972                     | 101.30                      | -70.19                             |
| <b>10</b> | -3268.5440       | 3.5740           | 1.940                        | 1.940                     | 109.40                      | -60.00                             |
| <b>11</b> | -1665.5157       | 3.5541           | 1.780                        | 1.780                     | -                           | -                                  |

**Table S3** Calculations of theoretical parameters using density functional theory (DFT)

**Table S4** Optimized structures of compounds 4-11 with DFT

| Compound | Optimized structure                                                                  |
|----------|--------------------------------------------------------------------------------------|
| 4        | 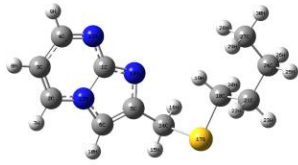    |
| 5        |    |
| 6        |    |
| 7        |   |
| 8        |  |
| 9        |  |
| 10       |  |
| 11       |  |

Fig. S1 HOMO-LUMO diagrams of compounds 4-11

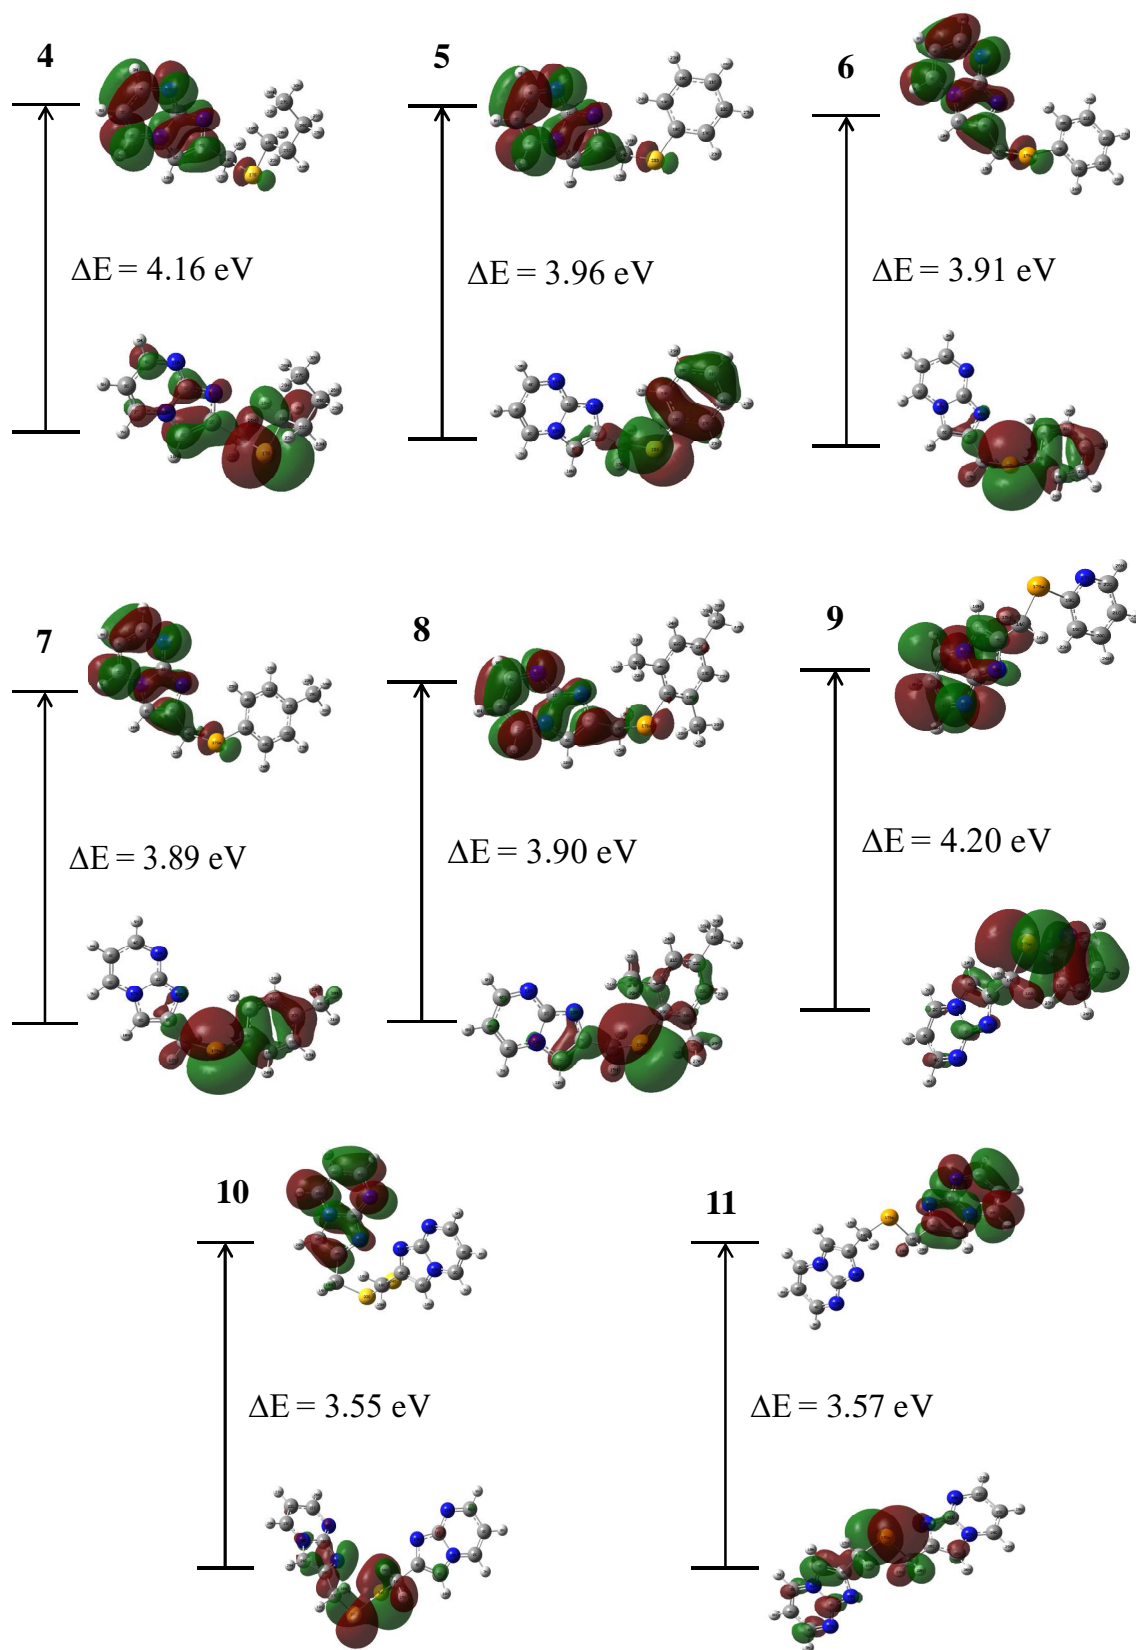

**Table S5** MIC values of compounds **4-11** and standard antifungal agent (Amp B) against various fungal stains (in ug/ml)<sup>a</sup>

| Compound     | <i>Candida albicans</i> | <i>Candida glabrata</i> | <i>Candida tropicalis</i> | <i>Candida krusei</i> | <i>Candida parapsolisis</i> | <i>Candida kyfer</i> | <i>Cryptococcus neoformans</i> | <i>Aspergillus niger</i> | <i>Neurospora crassa</i> |
|--------------|-------------------------|-------------------------|---------------------------|-----------------------|-----------------------------|----------------------|--------------------------------|--------------------------|--------------------------|
| <b>4</b>     | >27.62                  | >27.62                  | >27.62                    | >27.62                | >27.62                      | >27.62               | >27.62                         | NT                       | NT                       |
| <b>5</b>     | >30.12                  | >30.12                  | >30.12                    | >30.12                | >30.12                      | >30.12               | >30.12                         | NT                       | NT                       |
| <b>6</b>     | <b>36.00</b>            | >36.00                  | >36.00                    | >36.00                | >36.00                      | >36.00               | >36.00                         | >36.00                   | <b>18</b>                |
| <b>7</b>     | >37.75                  | >37.75                  | >37.75                    | >37.75                | >37.75                      | <b>18.87</b>         | >37.75                         | <b>37.75</b>             | <b>18.87</b>             |
| <b>8</b>     | >41.25                  | NT                      | NT                        | NT                    | NT                          | >41.25               | >41.25                         | >41.25                   | <b>20.62</b>             |
| <b>9</b>     | >36.12                  | NT                      | NT                        | NT                    | NT                          | >36.12               | >36.12                         | >36.12                   | <b>18.06</b>             |
| <b>10</b>    | >42.87                  | NT                      | NT                        | NT                    | NT                          | >42.87               | >42.87                         | >42.87                   | >42.87                   |
| <b>11</b>    | NT                      | NT                      | NT                        | NT                    | NT                          | NT                   | NT                             | NT                       | NT                       |
| <b>Amp B</b> | 0.78                    | -                       | -                         | -                     | -                           | 12.50                | 0.20                           | 0.39                     | 0.39                     |

<sup>a</sup>NT = Not Tested

**Table S6** MIC values of compounds **4-11** and standard antibacterial agent (RIF) against various bacterial strains (in µg/ml)

| Compounds  | <i>Escherichia coli</i> | <i>Staphylococcus aureus</i> | <i>Vibrio cholera</i> | <i>Enterococcus faecalis</i> | <i>Listeria monocytogens</i> |
|------------|-------------------------|------------------------------|-----------------------|------------------------------|------------------------------|
| <b>4</b>   | >27.62                  | >27.62                       | >27.62                | >27.62                       | >27.62                       |
| <b>5</b>   | >30.12                  | >30.12                       | >30.12                | >30.12                       | >30.12                       |
| <b>6</b>   | >36.00                  | >36.00                       | >36.00                | >36.00                       | >36.00                       |
| <b>7</b>   | <b>18.87</b>            | >37.75                       | >37.75                | <b>37.75</b>                 | >37.75                       |
| <b>8</b>   | >41.25                  | >41.25                       | >41.25                | >41.25                       | >41.25                       |
| <b>9</b>   | >36.12                  | >36.12                       | >36.12                | >36.12                       | >36.12                       |
| <b>10</b>  | >42.87                  | >42.87                       | >42.87                | >42.87                       | 42.87                        |
| <b>11</b>  | NT                      | NT                           | NT                    | NT                           | NT                           |
| <b>RIF</b> | 4.00                    | -                            | -                     | 12.50                        | 78.80                        |
